1 **Title: After the honeymoon, the divorce: unexpected outcomes of disease control measures**  
2 **against endemic infections**

3 Short Title: Unexpected outcomes of disease control measures against endemic infections

4

5 Authors: Brandon Hollingsworth<sup>a</sup>, Kenichi W Okamoto<sup>b</sup>, Alun L Lloyd<sup>a,c</sup>

6

7 Corresponding Author: Brandon Hollingsworth

8 Affiliations:

9 a) Biomathematics Graduate Program, North Carolina State University, Raleigh, NC 27695,

10 USA

11 b) Department of Biology, University of St. Thomas, St. Paul, MN, 55105, USA

12 c) Department of Mathematics, North Carolina State University, Raleigh, NC 27695, USA

13

14 Keywords: Disease Modeling, Endemic Disease, Control Cessation

15

16 **Abstract**

17 The lack of effective vaccines for many endemic diseases often forces policymakers to enact

18 control programs that rely on non-immunizing controls, such as vector control, in order to

19 reduce the massive burden of these diseases. It is well known that controls can have

20 counterintuitive effects, such as the honeymoon effect, in which partially effective controls

21 cause not only a greater initial reduction in infection than expected for an infection near its

22 endemic equilibrium, but also large outbreaks during control as a result of accumulation of

23 susceptibles. Unfortunately, many control measures cannot be maintained indefinitely, and the  
24 results of cessation are not well understood. Here, we examine the results of stopped or failed  
25 non-immunizing control measures in endemic settings. By using a mathematical model to  
26 compare the cumulative number of cases expected with and without the control measures, we  
27 show that deployment of control can lead to a larger total number of infections, *counting from*  
28 *the time that control started*, than without any control – the *divorce effect*. This result is  
29 directly related to the population-level loss of immunity resulting from non-immunizing  
30 controls and is seen in model results from a number of settings when non-immunizing controls  
31 are used against an infection that confers immunity. Finally, we also examine three control  
32 plans for minimizing the magnitude of the divorce effect in seasonal infections and show that  
33 they are incapable of eliminating the divorce effect. While we do not suggest stopping control  
34 programs that rely on non-immunizing controls, our results strongly argue that the  
35 accumulation of susceptibility should be considered before deploying such controls against  
36 endemic infections when indefinite use of the control is unlikely. We highlight that our results  
37 are particularly germane to endemic mosquito-borne infections, such as dengue virus, both for  
38 routine management involving vector control and for field trials of novel control approaches.

39

## 40 **Author Summary**

41 Many common endemic infections lack effective, inexpensive vaccinations, and control relies  
42 instead on transmission reduction, e.g. mosquito population reduction for dengue. Often,  
43 these controls are used with the immediate goal of decreasing the current incidence with little  
44 importance placed on what will happen at later points in time, and much less what will happen

45 once the control is stopped. Here, by looking at the cumulative incidence since the beginning  
46 of the control period, instead of the instantaneous incidence, we show that when controls are  
47 stopped, or fail, the resulting outbreaks can be large enough to completely eliminate any  
48 benefit of the control. We call this result the *divorce effect*. Further, we show that this result is  
49 not limited to specific transmission pathways or epidemiological parameters, but is instead tied  
50 directly to the reduction of herd immunity inherent in non-immunizing controls. Lastly, by  
51 evaluating programs to minimize the magnitude of the divorce effect, we show that without  
52 maintaining herd immunity, or successfully continuing control for decades, it is impossible to  
53 keep the costs of post-control outbreaks from outweighing the benefits of the control program.

54

## 55 **Introduction**

56 An estimated 200 million cases of malaria, 390 million cases of dengue fever, and 9 million  
57 cases of measles occurred in 2016 [1,2], representing only a portion of the total impact of  
58 endemic disease that year. The burden that this places on local populations, both in terms of  
59 morbidity and mortality and both direct and indirect economic costs, often pressures policy  
60 makers to act to suppress these infections. However, the scientific rationale on which the  
61 implemented policies are based is not always clear, making it difficult to assess whether the  
62 risks associated with control have been adequately addressed.

63

64 Eradication— the permanent reduction of worldwide incidence to zero [3]— is the ideal aim of  
65 all control programs. This goal is unrealistic, with only two infections having been successfully  
66 eradicated to date: smallpox and rinderpest [4]. Often, a more realistic goal for a control

67 program is either long-term suppression or local elimination of the infection. These goals hold  
68 their own challenges though, as they require long-term or even indefinite control programs,  
69 which can face budgetary and public support issues, not to mention the potential for some  
70 controls to fail due to evolution of resistance. Further, if there is a loss of herd immunity in the  
71 population due to the control lowering population exposure to the pathogen, there is the  
72 additional risk that when a control program ends the infection will re-emerge in a post-control  
73 epidemic and reestablish in the population [4].

74  
75 Naively, one might imagine that lowering the incidence of infection will have no detrimental  
76 effects for the population. However, mathematical modeling has previously revealed  
77 numerous perverse outcomes of application of ineffective control measures (by which we mean  
78 ones that do not bring the basic reproductive number,  $R_0$ , below one) in endemic settings.  
79 Perhaps the most famous example is the increased age at infection that results when a  
80 population is partially vaccinated for rubella, leading to more infections occurring in women of  
81 child-bearing age, where severe complications, such as congenital rubella syndrome, can result  
82 when pregnant women become infected [5–7]. While this certainly represents a potential  
83 downside of the control, the population sees a reduction in rubella prevalence. McLean and  
84 Anderson (1988) showed that when an ineffective control is used against an endemic infection  
85 it often results in an initial drop in prevalence to well below the endemic level, the “honeymoon  
86 effect”, but this is followed by outbreaks that periodically increase prevalence above the  
87 endemic level as a consequence of a build-up of susceptible individuals. Similarly, in a  
88 seasonally-forced setting, Pandey and Medlock [9] found that vaccination against dengue virus

89 could result in a transient period with periodic outbreaks of larger peak prevalence than  
90 occurred before vaccination. These last two examples illustrate possible negative side effects  
91 of ineffective controls: they can cause transient increases in prevalence while still resulting in a  
92 decrease in total incidence.

93

94 In the results above, there is higher incidence than expected, but Okamoto et al.[10] described  
95 an even more troubling theoretical result while exploring a model of failed or stopped  
96 combined strategies aimed at controlling dengue virus, e.g. vaccination along with transgenic  
97 vector control. They observed that when control was only transient the **total** number of  
98 infections that occurred, counting from the time that control started, a quantity they called the  
99 cumulative incidence (CI), could exceed the number of cases that would have been observed  
100 had no control been deployed. Even in situations where control measures had a significant  
101 positive impact over a period of years, the outbreaks that ensued following the cessation, or  
102 failure, of control could lead to an outbreak that was large enough to outweigh the number of  
103 cases prevented during the control period.

104

105 While Okamoto et al. [10] showed that it was possible for transient transgenic controls to  
106 increase the total number of infections, here we demonstrate that this effect—which we call  
107 the *divorce effect*—is not an artifact of very specific complex models, but quite a general  
108 phenomenon that can occur across a range of models and parameter space when deploying a  
109 control measure that does not confer immunity. By exploring the dynamics of the divorce effect  
110 in the setting of several simple models we gain insights that were not obtainable using the

111 previous complex models. Conversely, we find that for immunizing controls (e.g. vaccination)  
112 the divorce effect does not occur, even when the duration of protection is relatively short-lived.  
113  
114 We demonstrate the generality of this result for endemic infections by simulating cessation of  
115 control measures in three commonly-used models for pathogen transmission. Unlike the  
116 honeymoon effect, the divorce effect occurs for both ineffective and effective controls,  
117 provided that they are transient. As anticipated, control results in the accumulation of  
118 susceptible individuals resulting in the potential for a large outbreak following the cessation of  
119 control. This outbreak is either triggered by infective individuals that remain in the population  
120 or by reintroduction of infection from outside the control area, and its size increases  
121 asymptotically towards the size of a virgin-soil epidemic as the length of the control period is  
122 increased and herd immunity is lost. Counterintuitively, and comparable to results in Okamoto  
123 et al. [10], we see that the post-control outbreak often results in there being timeframes over  
124 which the cumulative incidence of infection since the start of control is higher than would have  
125 occurred in the absence of control. Further, these outbreaks are significantly larger than the  
126 endemic levels of the infection and would likely overwhelm healthcare providers in the area.  
127  
128 This paper is organized as follows. We first describe the three models we choose to illustrate  
129 the divorce effect: a non-seasonal SIR model, a seasonal SIR model, and a host-vector model.  
130 We then demonstrate, in each setting, the occurrence of the divorce effect and its sensitivity to  
131 relevant parameters, namely  $R_0$  and the duration and strength of control. Further, for the  
132 seasonal SIR model, we explore the sensitivity of the strength of the divorce effect on the

133 timing of the start and end of the control. Then for the seasonal SIR and seasonal host-vector  
134 model we look at three possible strategies for mitigating the divorce effect and show they are  
135 incapable of eliminating the divorce effect. A crude analytical approximation for the divorce  
136 effect and additional models are explored in the Supplemental Information, as is the impact of  
137 using immunizing controls.

138

## 139 **Models**

140 To evaluate the magnitude of the Divorce Effect, we simulate the cessation of a short-term  
141 control affecting transmission in three infection systems: a SIR model, a seasonal SIR model,  
142 and a host-vector SIR model. While these are the only models we discuss in detail here, this  
143 result can be seen in most models that have a replenishment of the susceptible population,  
144 including the more general SIRS model, for which host immunity is not life-long, and an age-  
145 structured model with realistic mixing parameters (see Supplemental Information for  
146 exploration of additional forms of transmission models). These results are parameterized for a  
147 human population and mosquito vector, but the results are generalizable to other species.

148

### 149 **SIR Model:**

150 We assume a well-mixed population of one million hosts and a non-fatal infection that is  
151 directly transmitted and confers complete life-long immunity. The numbers of susceptible,  
152 infective, and removed individuals are written as  $S$ ,  $I$  and  $R$ , respectively. We allow for  
153 replenishment of the susceptible population by births, but assume the population size is  
154 constant by taking per-capita birth and death rates,  $\mu$ , to be equal (this assumption is relaxed in

155 the supplemental information). This results in the standard two-dimensional representation of  
156 the SIR model, where the number of removed individuals is  $R = N - S - I$  (Equation 1).

$$157 \quad \dot{S} = \mu(N - S) - \beta \frac{S(I + I_b)}{N} \quad (1)$$

$$158 \quad \dot{I} = \beta \frac{S(I + I_b)}{N} - (\gamma + \mu)I$$

159 For our simulations, we assume parameters resembling a short-lived infection in a human  
160 population, lasting on average 5 days (average recovery rate,  $\gamma = 73/\text{year}$ ) and that individuals  
161 live on average 60 years ( $\mu = .0167/\text{year}$ ), allowing the transmission parameter,  $\beta$ , to be  
162 adjusted to achieve the desired value of  $R_0$ . In order to reseed infection following cessation of  
163 control and to counter the well-known weakness of infective numbers falling to arbitrarily low  
164 levels in deterministic transmission models, we follow numerous authors in including a constant  
165 background force of infection [11,12] in the model. This represents infectious contacts made  
166 with other populations, and occurs at a rate that is equivalent to there being  $I_b$  additional  
167 infective individuals within our focal population. For our simulations, we take  $I_b = 1$  (sensitivity  
168 of our results to  $I_b$  can be found in the supplemental information).

169

#### 170 **Seasonal SIR Model:**

171 For the seasonal SIR model, we allow the transmission parameter to fluctuate seasonally  
172 (annually) around its mean,  $\beta_0$ , taking the form given in Equation 2. Seasonal oscillations in the  
173 parameter have relative amplitude  $\beta_1 = .02$  with maxima occurring at integer multiples of 365  
174 days. Noting that seasonally forced models are particularly susceptible to having the number of



175 infectives fall to unreasonably low numbers between outbreaks [13], we again take  $I_b = 2$  in  
176 the background force of infection term.

$$177 \quad \beta(t) = \beta_0(1 + \beta_1 \cos(2\pi t)) \quad (2)$$

178

### 179 **Host-Vector Model:**

180 We model an infection with obligate vector transmission. As in other models, we assume that  
181 the host population size is held constant ( $R = N - S - I$ ), but we allow the vector population  
182 size to fluctuate—so that, for instance, we can model vector control. For simplicity, we only  
183 model the female adult vector population and assume density-dependent recruitment into the  
184 susceptible class ( $U$ ), with a logistic-type dependence on the total female adult population size.  
185 Infectious vectors ( $V$ ) arise from interactions with infected hosts (Equation 3).

$$186 \quad \dot{S} = \mu(N - S) - \beta_{VH} \frac{SV}{N}$$
$$187 \quad \dot{I} = \beta_{VH} \frac{SV}{N} - (\gamma + \mu)I \quad (3)$$

$$188 \quad \dot{U} = (U + V)(r - k(U + V)) - \beta_{HV} \frac{U(I + I_b)}{N} - \delta(t)U$$

$$189 \quad \dot{V} = \beta_{HV} \frac{U(I + I_b)}{N} - \delta I$$

190 We assume that host demography and recovery rates are the same as in the SIR model, with a  
191 host population of one million individuals. We assume that the vector lives on average 10 days  
192 ( $\delta = 36.5/\text{year}$ ), the growth constant ( $r$ ) and density dependence parameter ( $k$ ) are  
193 parameterized as in Okamoto et al. (2016):  $r = 304.775/\text{year}$  and  $k =$   
194  $1.341 \times 10^{-7}/(\text{vector} \cdot \text{year})$ , resulting in an equilibrium vector population of 2 million

195 individuals. The transmission parameter from host to vector ( $\beta_{HV}$ ) is assumed to be 109.5/year  
196 and the parameter for vector to host ( $\beta_{VH}$ ) is changed to produce the desired  $R_0$ . We again  
197 assume a background force of infection (with  $I_b = 2$ ), representing reintroduction of infection  
198 from outside our focal population.

199  
200 Seasonality plays a large role in vector-borne infections and affects many aspects of the  
201 infection and its vector. Temperature affects breeding rates, larval development, and death  
202 rates of the vector, the extrinsic incubation period and transmissibility of the infection itself,  
203 and host encounter rates, while precipitation can affect the availability of appropriate habitat  
204 and encounter rates [14–16]. However, most of these add a level of model complexity which is  
205 unnecessary for this study, so we choose to use a simple forcing term for mosquito recruitment  
206 that fluctuates seasonally with relative magnitude  $r_s$  ( $r_s = 0.02$ ) about its baseline ( $r_0 =$   
207 304.775 /year) (Equation 4).

$$208 \quad r(t) = r_0(1 + r_s \cos(2\pi t)) \quad (4)$$

209

#### 210 **Control:**

211 We model a control that is applied instantaneously and consistently from time  $t_0$  (which, for  
212 simplicity, we usually take to be equal to zero) to time  $t_{\text{end}}$  and is instantaneously removed at  
213 the end of the control period. In the SIR and seasonal SIR models, control reduces the  
214 transmission rate by some proportion,  $\varepsilon$ , and, in the host vector model, causes a proportional  
215 increase,  $\sigma$ , in the vector mortality rate. This results in the transmission parameter given in

216 Equation 5 for directly transmitted infections and the vector death rate given in Equation 6 for  
217 the vector-borne infections.

$$218 \quad \beta(t) = \begin{cases} (1 - \varepsilon)\beta_0 & t_0 < t < t_{end} \\ \beta_0 & \text{otherwise} \end{cases} \quad (5)$$

219

$$220 \quad \delta(t) = \begin{cases} (1 + \sigma)\delta_0 & t_0 < t < t_{end} \\ \delta_0 & \text{otherwise} \end{cases} \quad (6)$$

221

222 While we only look at these control measures in the main text, other controls (such as an  
223 increase in the recovery rate,  $\gamma$ ) are explored in the Supplemental Information (Figure S2), and  
224 give similar results.

225

### 226 **Measuring Effectiveness:**

227 There are a number of measures that can be used to quantify the effectiveness of a control. We  
228 want to characterize the total number of cases that occur from the start of control until a  
229 particular point in time, a quantity we call the cumulative incidence (CI). For a directly  
230 transmitted infection, this is calculated as follows

231

$$232 \quad CI(t) = \int_{t_0}^t \frac{\beta(\tau)S(\tau)I(\tau)}{N} d\tau, \quad (7)$$

233

234 i.e. by integrating the transmission term over the time interval from the start of control until  
235 the time,  $t$ , of interest. This quantity could be calculated both in the presence of control and in

236 the baseline, no-control, setting; we distinguish between these two by labeling quantities (e.g.  
237 state variables) in the latter case with a subscript B to denote baseline.

238  
239 One commonly-used measure of effectiveness is the number of cases averted by control (CA),  
240  $CI_B(t) - CI(t)$ . This has the disadvantage (particularly in terms of graphical depiction) that it can  
241 become arbitrarily large as  $t$  increases. Consequently, some authors choose to utilize a relative  
242 measure of cases averted, dividing by the baseline cumulative incidence (see, for instance, the  
243 work of Hladish et al. [17]). We instead follow our earlier work and use the relative cumulative  
244 incidence (RCI) measure employed by Okamoto *et al.* [10], calculating the cumulative incidence  
245 of the model with the control program relative to the cumulative incidence of the model  
246 without the control program (Equation 8).

247

$$248 \quad RCI(t) = \frac{\int_{t_0}^t \beta(\tau)S(\tau)I(\tau)d\tau}{\int_{t_0}^t \beta S_B(\tau)I_B(\tau)d\tau}. \quad (8)$$

249  
250 RCI( $t$ ) values above one imply that the control measure has resulted in an increase in the total  
251 number of cases compared to the baseline. Importantly, as time becomes larger, RCI becomes  
252 less sensitive to outbreaks in the system. For a transient control, RCI will approach 1 as  $t$   
253 becomes larger.

254  
255 We see that the relative cases averted measure employed by Hladish et al. [15] is simply 1-  
256 RCI( $t$ ). Both relative measures have properties that make them attractive for graphical

257 depiction although it should be borne in mind that both involve a loss of information on the  
258 actual number of cases averted. For example, an RCI of 1.1 after one year is a much smaller  
259 increase in total cases than an RCI of 1.1 after 10 years, and an RCI of just below one after many  
260 years can represent a large reduction in total incidence. In cases where this information is  
261 pertinent, it may be more appropriate to use non-relative measures such as cases averted. The  
262 choice of measure does not impact the occurrence of the divorce effect; figures that show  
263 cases averted are included in the Supplemental Information (Figure S1).

264  
265 Analogous expressions for CI and RCI can be written for the host-vector model using the  
266 appropriate transmission terms.

267

## 268 **Results**

### 269 **SIR Model**

270 Simulations show the successful suppression of infection following the implementation of a  
271 control which reduces the transmission parameter,  $\beta$ , in the population. With infection at  
272 endemic equilibrium, the honeymoon effect [8] states that even a modest reduction in the  
273 transmission parameter will have a large effect on the incidence of the infection due to the  
274 effective reproductive number,  $R_t$ , the expected number of new infections each infectious  
275 individual causes, being one. After the control is stopped, the incidence of the infection  
276 remains low for some time as the number of infective individuals builds from very low numbers  
277 (Figure 1(a), curve). However, once control ends  $R_t$  immediately rises above one and continues  
278 to increase while prevalence is low, due to the buildup of the susceptible population (plots of  $R_t$

279 and  $S(t)$  are provided in the supplemental information: see Figure S3). This increased  $R_t$   
280 eventually drives a large outbreak, quickly depleting the susceptible population, at which point  
281 incidence (Figure 1(a), black curve), and  $R_t$ , again fall to low numbers.

282  
283 To evaluate the success of the control, we examine the RCI in the period following introduction  
284 of control and see that during and immediately following the control period, when incidence is  
285 low, the RCI decreases towards 0, suggesting a successful control program. However, once the  
286 post-control outbreak begins, RCI increases rapidly resulting in the divorce effect ( $RCI > 1$ ) before  
287 dropping back below one once the epidemic begins to wane and incidence falls below endemic  
288 levels (Figure 1(a)). During the period where  $RCI > 1$ , lasting approximately 2 years in our  
289 example, the control has not only failed to decrease the total incidence of infection but has  
290 resulted in an increase in total incidence, the divorce effect. Following this initial outbreak and  
291 trough, RCI continues to oscillate around one, and approaches one in the long run (see Figure  
292 S4).

293  
294 Exploring values of  $R_0$  and the duration and strength of control shows that the divorce effect is  
295 present over a wide region of parameter space. Figure 1(b) shows the magnitude of the divorce  
296 effect, quantified by the maximum RCI seen, as a function of  $R_0$  and duration of control for a  
297 perfect control measure ( $\beta = 0$  during the control period). Perfect control was employed here to  
298 eliminate any confounding effects from the honeymoon effect that could occur during an  
299 imperfect control. We find that for the most biologically relevant area of parameter space  
300 ( $R_0 < 20$ , control lasting less than 20 yrs) the divorce effect always occurs and will result in a 20-

301 60% increase in cumulative incidence ( $RCI=1.2-1.6$ ) at its peak. However, we also find that it is  
302 possible to avoid the divorce effect if controls are maintained long enough. For infections with  
303 a high  $R_0$ , this requires maintaining the control for decades, and the length of time needed  
304 grows as  $R_0$  is decreased. The non-monotonic relationship between the magnitude of the  
305 divorce effect and the length of the control seen here suggests that a control program should  
306 either be discontinued immediately, if  $R_0$  is small, or continued as long as possible to avoid the  
307 divorce effect (Figure 1(b); see also Figure S5 in Supplemental Information).

308  
309 Relaxing our assumption of a completely effective control and focusing on a fixed  $R_0$  ( $R_0=5$ ,  
310 Figure 1(c)), we see that the relationship between the magnitude of the divorce effect and the  
311 length of the control period varies with the strength of the control. A steep edge-like pattern is  
312 seen in Figure 1c when control is ineffective but carried out for a long period of time, a  
313 consequence of the honeymoon effect. For populations at endemic equilibrium, the  
314 honeymoon effect means that any reduction in transmission will be sufficient to significantly  
315 reduce transmission for a period of time. For controls that are relatively short lived, here  
316 approximately 5 years, the control does not outlast the honeymoon period, resulting in the  
317 magnitude of the divorce effect being relatively insensitive to the effectiveness of the control in  
318 this region of parameter space. How the interaction between the effectiveness of control and  
319  $R_0$  affects the magnitude of the divorce effect is explored in the supplemental information  
320 (Figure S6).

321

322 **Seasonal SIR Model**

323 Temporary control measures in the seasonal SIR model show many of the same dynamics as in  
324 the non-seasonal model, namely that a successful control is followed by a period of low  
325 incidence and eventually a post-control outbreak leading to a divorce effect (Figure 2(a)) before  
326 settling back into regular seasonal outbreaks (Figure S7). However, the timing and size of the  
327 post-control epidemic, and thus the magnitude of the divorce effect, depend not only on  $R_0$  and  
328 the length of the control but also the timing of both the onset and end of the control (Figures  
329 2(b) and 2(c)). This leads to a highly nonlinear dependence of the magnitude of the divorce  
330 effect on  $R_0$  and the duration of control (Figure 2(b)). However, the presence of ranges of  
331 parameter space with smaller magnitudes of the Divorce Effect at regular intervals could allow  
332 policy makers to determine optimal times to stop control. These effects become more  
333 apparent with an increase in seasonality (Figure S8). As seasonality increases, the differences  
334 due to timing become more pronounced, resulting in more potential for mitigating the divorce  
335 effect with a properly timed treatment. Conversely, this also means a larger divorce effect will  
336 be seen with a poorly timed treatment (Figure S8).

337

338 The oscillatory nature of the relationship between the maximum RCI and  $R_0$  (Figure 2(b))  
339 implies a relationship between the timing of the control period and the severity of the divorce  
340 effect. While the magnitude is only highly sensitive to the start time for very short control  
341 periods, lasting around a year, it is highly sensitive to the end time (Figure 2(c)). This means  
342 that controls of similar lengths can have significantly different outcomes depending on their  
343 timing, e.g. a 1 year control ending day 700 results in a maximum RCI around 1.4 while a control  
344 of the same length ending day 515 results in a maximum RCI near 1.7. This is a direct result of



345 the seasonal forcing function and delaying the outbreak until a period in which  $R_0$  is larger,  
346 similar to results seen when controls are used against epidemics in seasonal settings [18,19].  
347 Regardless of start time, the optimal end time occurs shortly after the peak in the transmission  
348 parameter,  $\beta(t)$ , (days 750 and 1155 in Figure 2(c)), suggesting this would be the best time to  
349 end control programs.

350

### 351 **Host-Vector Model**

352 The non-seasonal host-vector model has broadly similar dynamics to the non-seasonal SIR  
353 model in terms of the divorce effect (Figures S10 and S11), so here we focus instead on the  
354 seasonal host-vector model. Following one year of insecticide treatment that reduces the  
355 average mosquito lifespan by a half (i.e. increases the mosquito death rate by 100%,  $\sigma = 1$ ) the  
356 infection is suppressed and there is no seasonal outbreak for the next two years (Figure 3). A  
357 major outbreak, with approximately eight times the peak prevalence of the pre-control  
358 seasonal outbreaks, occurs in the third year and results in a maximum RCI of around 1.50,  
359 before the epidemic fades and incidence again returns to low levels. The size of this outbreak  
360 would almost certainly risk overwhelming even the most well-funded medical services. RCI then  
361 remains above 1 until year 7. The population continues to see large periodic outbreaks, each  
362 bringing RCI back above 1, for decades until the endemic equilibrium is reached again (Figure  
363 S12).

364

### 365 **Mitigating the Divorce Effect**

366 It is apparent from earlier results (e.g. Figure 1(b)) that avoiding the divorce effect in a non-  
367 seasonal setting is only possible with a non-immunizing control by maintaining suppression for  
368 decades, due to the inevitable build-up of susceptible individuals. Therefore, the goal in these  
369 situations should be to maintain the control as long as possible or until a vaccine becomes  
370 available, and we focus instead on the seasonal SIR and host-vector models. In this section, we  
371 look at three different treatment plans for deploying a set amount of treatment, twelve one-  
372 month treatments, and their ability to mitigate the divorce effect. The first relies on annual  
373 controls lasting one month when  $R_0$  is at its maximum, the second has a month-long control  
374 applied in response to the prevalence reaching some set level—which we might imagine  
375 corresponding to an outbreak becoming detectable or reaching a sufficient level to cause  
376 concern to local authorities—that we take here to be when two hundred individuals out of a  
377 million are infective, and the third chooses when to implement a month-long control based on  
378 minimizing the peak RCI. For comparison, all three use 12 total months of control.

379  
380 With annual monthly control for a directly transmitted seasonal infection, the population sees a  
381 significant initial reduction in prevalence. However, as predicted by the honeymoon effect, the  
382 repeated use of controls results in a diminished effect on the prevalence and seasonal  
383 outbreaks begin to occur between control periods. The peak prevalence of these outbreaks  
384 quickly grows to be significantly larger than the seasonal outbreaks before the control program  
385 was begun, however they are blunted by the next control period before RCI rises above one.  
386 Once the program is ended, however, a post-control outbreak quickly brings RCI above one  
387 (Figure 4(a)).

388

389 The reactive control has a similar effect following the initial control period, however it results in  
390 ever more rapid need for control, exhausting all 12 months of treatment in the first four years  
391 for both the directly transmitted infection (Figure 4(b)). We see that while this results in a  
392 lower RCI during the control program, it results in an even larger post-control outbreak and a  
393 larger maximum RCI for both transmission pathways.

394

395 Intuitively, Figure 2(c) suggests choosing a time period to implement the control that will  
396 minimize the divorce effect. To do this, we implement a third method which optimally chooses  
397 the time at which to begin the next control period. For this, we simulate the first one month  
398 control period, beginning at time 0. Then we run simulations with the next one month control  
399 beginning on all possible days over the next 365 days after the control ends, choosing the day  
400 that results in the lowest maximum RCI over the next decade, simulating through that control  
401 period, and repeating. This plan results in implementing the first three control periods in rapid  
402 succession and the remainder after the peak of an outbreak, when the control will have the  
403 least effect on transmission (Figure 4(c)), minimizing the magnitude of the divorce effect albeit  
404 at the cost of not providing significant protection against the infection. This result, along with  
405 other earlier results, suggests that the divorce effect is unavoidable and the potential for a  
406 divorce effect will continue to grow in magnitude unless the control is maintained for decades,  
407 regardless of the timing of the treatments. While it may not be possible to eliminate the  
408 divorce effect for relatively short controls, it may be possible to extend programs without

409 worsening the divorce effect and to minimize the divorce effect by carefully choosing the timing  
410 of the end of the control program once cessation becomes necessary.

411  
412 In the case of host-vector transmission, the yearly control successfully suppresses the infection  
413 for the first 1.5 years, however the population begins to experience outbreaks during what was  
414 traditionally the off-season. After the control program is ended, the population enters a period  
415 of larger outbreaks occurring every three years (Figure S15(a)). The reactive control sees a  
416 similar result as the directly transmitted disease, with all twelve treatments used in the first 4  
417 years (Figure S15(b)). For the third method, the optimal plan was to wait the maximum amount  
418 of time to deploy the control (Figure S15(c)). This is likely due to the peak of an outbreak not  
419 occurring within a year of the end of treatment in the seasonal host-vector model.

420

## 421 **Additional Results**

422 Results for additional models, along with an analytical approximation to the magnitude of the  
423 divorce effect are included in the supplemental information.

424

## 425 **Discussion**

426 It has long been appreciated that non-immunizing control measures deployed against endemic  
427 infections will result in a large short-term reduction in prevalence but will lead to a reduction in  
428 herd immunity, leaving the population at risk of large outbreaks after the cessation of control.  
429 Here we have shown, in quite general settings, that these outbreaks can be so large as to  
430 increase, counting from the time that control started, the total incidence of infection above

431 what would have occurred if no control had been used—a result we call the divorce effect. This  
432 represents a failure for control of the worst kind, namely a control that increases the total  
433 incidence of the infection. Unfortunately, many commonly used disease control plans rely on  
434 temporary non-immunizing controls, meaning that populations may be left at risk of the divorce  
435 effect once the control measure is ended.

436

437 Controls that do not confer immunity—including isolation, use of drugs as a prophylaxis or to  
438 shorten duration of infectiousness or behavioral changes such as social distancing—are often  
439 deployed in epidemic settings, particularly for new pathogens for which a vaccine is  
440 unavailable, but may also be used to blunt seasonal outbreaks of endemic diseases. In these  
441 endemic settings, we have shown that it is important to weigh any potential benefit from these  
442 controls against the risk of post-control outbreaks and the divorce effect. While there are  
443 timeframes over which a temporary non-immunizing control has benefits, the severity of the  
444 post-control outbreak that results in the divorce effect will risk overwhelming even well-  
445 maintained healthcare systems.

446

447 Vector-borne infections represent the most common situation in which non-immunizing  
448 controls are regularly used against endemic diseases, e.g. insecticide spraying to combat  
449 seasonal dengue outbreaks. The honeymoon effect predicts that insecticides can provide  
450 short-term benefits in endemic settings but that the additional benefit of continued spraying  
451 will decrease over time due to the accumulation of susceptibles (i.e. depletion of herd  
452 immunity) that results. Indeed, Hladish *et al.* [17] saw precisely these effects using a detailed

453 agent-based model for dengue control that employs indoor residual spraying. Cessation of  
454 spraying will be expected to lead to large post-control outbreaks: again, Hladish *et al.*'s model  
455 exhibited annualized incidence of 400% compared to the uncontrolled baseline setting in  
456 certain years. Here, we examine the divorce effect directly and show that they are not specific  
457 to a host-vector model and that if the control is not maintained indefinitely, or at least for a few  
458 decades, the damage of the divorce effect can quickly outweigh the short-term benefits.  
459 Further, programs implementing insecticides may be intended to be indefinite, but the  
460 evolutionary pressure imposed can result in the rapid and unpredictable evolution of  
461 resistance. Without proper monitoring, this could result in an increase in total incidence due to  
462 the divorce effect before officials realize that resistance has developed. While insecticides, and  
463 other non-immunizing controls, will, and should, continue to play an important role in epidemic  
464 settings, where herd immunity is negligible, the results of this study raise important questions  
465 about their use in combating endemic infections.

466

467 In some instances, control measures are deliberately transient in nature, such as field trials for  
468 assessing the impact of proposed novel control methods, e.g. a review of field trials of dengue  
469 vector control showed they lasted between 5 months and 10 years [20]. Multiple year field  
470 trials such as these can result in considerable build-up of the susceptible population, meaning  
471 consideration needs to be given to the consequences of this accumulation and the potential for  
472 large outbreaks to occur in the wake of cessation of the trial. If our results are validated, they  
473 must be factored not only into the design of such trials but also into the informed consent  
474 process for trial participation, with participants made aware of the risk of the divorce effect and

475 plans put in place to provide a reasonable level of protection during and following the study. As  
476 we have shown, these outbreaks can occur months or even many years later, and while disease  
477 incidence would be observed closely during the trial, our results argue that monitoring should  
478 continue for an appropriate length of time following the cessation of control. Furthermore, we  
479 emphasize that the epidemiological consequences of the honeymoon effect—specifically the  
480 relative ease of reducing incidence for an infection near endemic equilibrium—must be kept in  
481 mind when interpreting the results of such trials. Together, these dynamical effects argue that  
482 susceptibility of the population to infection should be monitored together with incidence to  
483 fully assess the impact and effectiveness of the control.

484

485 Additional concerns are raised when an endemic and an epidemic infection share the same  
486 transmission pathway (e.g. *Aedes aegypti* vectoring both dengue and Zika). Emergency control  
487 against the epidemic infection also impacts the endemic infection, leading to the potential for  
488 the divorce effect to occur in the latter if the control is ceased once the epidemic has subsided.  
489 It may be that policy makers have to choose to allow an epidemic of a highly publicized, but low  
490 risk, epidemic in order to maintain immunity levels of another lower profile, but more  
491 dangerous, disease. On the other hand, if the risk due to the epidemic is sufficiently high, it  
492 may still be advantageous to use the control, however the risks need to be carefully compared  
493 and an informed decision, that accounts for the divorce effect, needs to be made.

494

495 While transient non-immunizing controls are common and provide opportunities to observe the  
496 divorce effect, researchers tend to focus on prevalence or incidence over short periods of time

497 and not cumulative measures such as CI or relative measures such as RCI or CA, which would  
498 expose the divorce effect. Even when relative measures are used, such as Hladish et al. [17],  
499 the time frame over which incidence is compared can have a drastic effect on the  
500 interpretation of the result. The divorce effect is an easily missed phenomenon, even when  
501 examining models that lack much of the real-world complexity, but real-world data comes with  
502 a myriad of other problems. Often the divorce effect may occur when the system is poorly  
503 monitored, as with field trials and unintentional control, in systems that, like dengue, have  
504 large year-to-year variation, or in systems where the failure is associated with other  
505 confounding socio-economic events such as war or natural disaster, resulting in data that is  
506 either scarce or difficult to interpret. The divorce effect may become more apparent in coming  
507 years, though, as mosquito control is lessened following the end of the Zika epidemic, allowing  
508 for a rebound in dengue in areas such as South America, and as insecticide resistance problems  
509 continue to grow.

510

511 Careful thought should be given to whether or not it is appropriate to begin new programs that  
512 rely on non-immunizing controls in endemic settings. This is an inherently complicated decision  
513 that must take into account numerous factors, both scientific and sociopolitical, but, in light of  
514 our results, policymakers should carefully weigh the risks of the divorce effect against other  
515 factors, e.g. imminent approval of a new vaccine or political pressure, before implementing  
516 disease management plans that rely on non-immunizing controls. Further, it is important that  
517 when non-immunizing controls are included in these management plans that they are not



518 considered possible solutions but instead stop-gaps, and emphasis is placed on the  
519 development of vaccination as opposed to the indefinite continuation of the program.  
520  
521 Currently, control of endemic diseases worldwide, especially vector-borne diseases, relies  
522 heavily on non-immunizing controls such as insecticide. Policy makers should begin developing  
523 exit plans for these disease management programs —guidelines for safely ending the program  
524 when it becomes clear that indefinite maintenance is unlikely, which should be designed to  
525 minimize the impact of the divorce effect. In this paper, we have shown three possible designs  
526 for exit plans that could minimize the divorce effect. However, none of these designs were  
527 capable of eliminating the divorce effect. Our results suggest there is an inherent cost  
528 associated with the loss of immunity resulting from these programs.

529

530

## 531 **Acknowledgements**

532 We thank Fred Gould, Sumit Dhole, Michael Vella, Christian Gunning, Jennifer Baltzegar, and  
533 Jaye Sudweeks for helpful discussion.

534

## 535 **Works Cited**

- 536 1. Abajobir AA, Abate KH, Abbafati C, Abbas KM, Abd-Allah F, Abdulkader RS, et al. Global,  
537 regional, and national disability-adjusted life-years (DALYs) for 333 diseases and injuries  
538 and healthy life expectancy (HALE) for 195 countries and territories, 1990–2016: a  
539 systematic analysis for the Global Burden of Disease Study 2016. *Lancet*. 2017;390:

- 540 1260–1344. doi:10.1016/S0140-6736(17)32130-X
- 541 2. Bhatt S, Gething PW, Brady OJ, Messina JP, Farlow AW, Moyes CL, et al. The global  
542 distribution and burden of dengue. *Nature*. 2013;496: 504–507.  
543 doi:10.1038/nature12060
- 544 3. Dowdle WR. The principles of disease elimination and eradication. *Bull World Health*  
545 *Organ*. 1998;76 Suppl 2: 22–5. Available:  
546 <http://www.ncbi.nlm.nih.gov/pubmed/10063669>
- 547 4. Klepac P, Funk S, Hollingsworth TD, Metcalf CJE, Hampson K. Six challenges in the  
548 eradication of infectious diseases. *Epidemics*. 2015;10: 97–101.  
549 doi:10.1016/j.epidem.2014.12.001
- 550 5. Anderson RM, May RM. Directly Transmitted Infectious Diseases: Control by Vaccination.  
551 *Science* (80- ). 1982;215: 1053–1060. doi:10.1126/science.7063839
- 552 6. Knox EG. Strategy for rubella vaccination. *Int J Epidemiol*. 1980;9: 13–23.  
553 doi:10.1093/ije/9.1.13
- 554 7. Heesterbeek H, Anderson RM, Andreasen V, Bansal S, De Angelis D, Dye C, et al.  
555 Modeling infectious disease dynamics in the complex landscape of global health. *Science*  
556 (80- ). 2015;347: aaa4339–aaa4339. doi:10.1126/science.aaa4339
- 557 8. Mclean AR, Anderson RM. Measles in developing countries. Part II. The predicted impact  
558 of mass vaccination. *Epidemiol Infect*. 1988;100: 419–442.  
559 doi:10.1017/S0950268800067170
- 560 9. Pandey A, Medlock J. The introduction of dengue vaccine may temporarily cause large  
561 spikes in prevalence. *Epidemiol Infect*. 2015;143: 1276–1286.

- 562           doi:10.1017/S0950268814001939
- 563    10.   Okamoto KW, Gould F, Lloyd AL. Integrating Transgenic Vector Manipulation with Clinical  
564           Interventions to Manage Vector-Borne Diseases. *PLOS Comput Biol.* 2016;12: e1004695.  
565           doi:10.1371/journal.pcbi.1004695
- 566    11.   Ferguson NM, Anderson RM, Garnett GP. Mass vaccination to control chickenpox: The  
567           influence of zoster. *Proc Natl Acad Sci USA.* 1996;93: 7231–7235.  
568           doi:10.1073/pnas.93.14.7231
- 569    12.   Ferguson NM, Nokes DJ, Anderson RM. Dynamical complexity in age-structured models  
570           of the transmission of the measles virus: Epidemiological implications at high levels of  
571           vaccine uptake. *Math Biosci.* 1996; doi:10.1016/S0025-5564(96)00127-7
- 572    13.   Grenfell BT. Chance and Chaos in Measles Dynamics. *J R Stat Soc Ser B.* 1992;  
573           doi:10.1111/j.2517-6161.1992.tb01888.x
- 574    14.   Dell AI, Pawar S, Savage VM. Systematic variation in the temperature dependence of  
575           physiological and ecological traits. *Proc Natl Acad Sci.* 2011;108: 10591–10596.  
576           doi:10.1073/pnas.1015178108
- 577    15.   Mordecai EA, Cohen JM, Evans M V., Gudapati P, Johnson LR, Lippi CA, et al. Detecting  
578           the impact of temperature on transmission of Zika, dengue, and chikungunya using  
579           mechanistic models. *PLoS Negl Trop Dis.* 2017;11: e0005568.  
580           doi:10.1371/journal.pntd.0005568
- 581    16.   Mordecai EA, Paaijmans KP, Johnson LR, Balzer C, Ben-Horin T, de Moor E, et al. Optimal  
582           temperature for malaria transmission is dramatically lower than previously predicted.  
583           *Ecol Lett.* 2013;16: 22–30. doi:10.1111/ele.12015

- 584 17. Hladish TJ, Pearson CAB, Patricia Rojas D, Gomez-Dantes H, Halloran ME, Vazquez-  
585 Prokopec GM, et al. Forecasting the effectiveness of indoor residual spraying for  
586 reducing dengue burden. *PLoS Negl Trop Dis.* 2018;12: e0006570.  
587 doi:10.1371/journal.pntd.0006570
- 588 18. Bacaer N, Gomes G. On the Final Size of Epidemics with Seasonality. *Bull Math Biol.*  
589 2009;71: 1954–1966. doi:10.1007/s11538-009-9433-7
- 590 19. Towers S, Vogt Geisse K, Zheng Y, Feng Z. Antiviral treatment for pandemic influenza:  
591 Assessing potential repercussions using a seasonally forced SIR model. *J Theor Biol.*  
592 2011;289: 259–268. doi:10.1016/j.jtbi.2011.08.011
- 593 20. Bowman LR, Donegan S, McCall PJ. Is Dengue Vector Control Deficient in Effectiveness or  
594 Evidence?: Systematic Review and Meta-analysis. *PLoS Negl Trop Dis. Public Library of*  
595 *Science*; 2016;10: e0004551. doi:10.1371/journal.pntd.0004551

596 **Figure 1: The divorce effect in the SIR model. (a) Typical time-series showing the divorce**  
597 **effect.** Beginning at time zero, a year-long 50% reduction in the transmission parameter of an  
598 endemic infection ( $R_0 = 5$ ,  $\beta = 365$  /year,  $\gamma = 73$  /year) reduces prevalence of the infection  
599 to near zero for the length of the control, where it remains until time 1.5 yrs, at which point a  
600 large post-control outbreak occurs. RCI falls towards zero as prevalence remains low, but the  
601 post-control outbreak is large enough to bring RCI well above 1 (peak RCI is approx. 1.4). **(b)**  
602 **Magnitude of divorce effect in terms of relative cumulative incidence (RCI).** Maximum RCI is  
603 found as the highest value of RCI observed within 25 yrs following a 100% effective control of  
604 an infection with  $1 < R_0 < 20$  and lasting between 1 month and 35 years.  $RCI > 1$  indicates the  
605 divorce effect and we see that the divorce effect occurs across a large portion of the parameter

606 space, and ubiquitously for controls lasting less than 20 years.  $\beta$  is varied to attain the desired  
607  $R_0$ , all other parameters as in (a). **(c) Maximum RCI for a given effectiveness and duration of**  
608 **control.** The maximum RCI is found as the maximum observed RCI within 25 yrs after the end  
609 of a control that is between 0% and 100% effective and lasts between 1 month and 20 years  
610 ( $R_0=5$ ). The ridge between areas of high and low maximum RCI results from ineffective controls  
611 being maintained long enough for outbreaks due to the honeymoon effect depleting the  
612 population of susceptible individuals before the control periods end. All other parameters as in  
613 (a).

614

615

616 **Figure 2: The divorce effect in the seasonal SIR model. (a) Typical time-series showing the**  
617 **divorce effect.** Beginning at time zero, when the transmission parameter is at its maximum, a  
618 year-long 90% reduction in the transmission parameter of an endemic infection ( $R_0 = 5$ ,  $\beta_0 =$   
619  $365 / \text{year}$ ,  $\beta_1 = .02$ ,  $\gamma = 73 / \text{year}$ ) is implemented at the beginning of a seasonal outbreak and  
620 reduces prevalence of the infection to near zero for the length of the control. Following the  
621 end of the control, a large outbreak, many times the size of the regular seasonal outbreaks,  
622 occurs during the next season. RCI falls towards zero as prevalence remains low while the  
623 control is in effect and rises above 1 during the large outbreak the following year (Maximum RCI  
624 = 1.2). **(b) Magnitude of divorce effect in terms of relative cumulative incidence (RCI).**

625 Maximum RCI is found as the highest value of RCI observed within 25 yrs following a 100%  
626 effective control of an infection with  $1 < R_0 < 20$  and lasting between 1 month and 35 years.  $\text{RCI} > 1$   
627 indicates the divorce effect and we see that the divorce effect occurs in most of the parameter

628 space.  $\beta_0$  is varied to attain the desired  $R_0$ , with all other parameters as in (a). **(c) Effect of**  
629 **timing on the magnitude of the divorce effect.** Maximum RCI is the highest RCI observed  
630 within 25 yrs following a 100% effective control of an infection with  $R_0 = 10$  ( $\beta =$   
631  $730$  /year, all other parameters as in (a) ) beginning and ending on specified days. Dashed  
632 lines represent controls lasting either 1, 2, or 3 years. Unlike the non-seasonal SIR model  
633 (Figure 1), the magnitude of the divorce effect is not solely dependent on  $R_0$  and the length of  
634 the control. Maximum RCI is most sensitive to the day the control is ended, moderately  
635 sensitive to the day it is started, and only slightly sensitive to the length of the control. This is  
636 due to the timing of the end of the control determining the timing of the outbreak. We also see  
637 that continuing the control for another year often has little impact on the magnitude of the  
638 divorce effect.

639  
640 **Figure 3: Divorce Effect in a Seasonal Host-Vector model.** Control is shown in a seasonal ( $r_s =$   
641  $.02$ ) host-vector model with  $R_0 = 5$ . Beginning at time zero, a control is implemented that  
642 increases the vector mortality rate by 100% (corresponding to a 50% drop in vector life  
643 expectancy). This results in a reduction in prevalence (black curve) of the infection to near zero  
644 during the control period, where it remains until roughly time 3 yrs, at which point a large post-  
645 control outbreak occurs. RCI (red curve) falls towards zero during the control period and while  
646 prevalence remains low, but the post-control outbreak is large enough to bring RCI above 1  
647 (peak of approx. 1.49).

648

649 **Figure 4: Suggested techniques for mitigating the divorce effect with seasonal transmission.**

650 We consider an endemic disease, parameterized as in Figure 2(a). In all cases, twelve 1/12 yr.  
651 controls are used, to be consistent with the 1 yr. controls used in other figures, reducing the  
652 transmission parameter by 90% ( $\epsilon = .9$ ). **(a) Pulsed control for Seasonal SIR model.** Control  
653 occurs yearly at a fixed time (when  $R_0$  is highest) for a fixed time (1/12 yr.) to control an  
654 endemic disease (parameterized as in Figure 2(a)). The control is effective at stopping the  
655 outbreak the first year, but seasonal outbreaks in subsequent years are larger, driven by an  
656 increasing population of susceptible individuals. Stopping the control program still results in a  
657 large post-control outbreak and a divorce effect. **(b) Reactive Control for Seasonal SIR.** A fixed  
658 length (1/12 yr.) control is implemented to control an endemic disease (parameterized as in  
659 Figure 2(a)) once prevalence rises above a threshold (200 individuals in a population of 1  
660 million). This stops the large early season outbreaks seen in the pulsed control, however the  
661 frequency of treatment increases as the susceptible population grows. Stopping the control  
662 program results in a large outbreak and divorce effect. **(c) Informed Control in seasonal SIR**  
663 **model.** The first control period occurs at time 0. The beginning of the next control period is  
664 decided at the end of the previous control period, and is the day (allowed to be up to a  
665 maximum of 365 days later) that will result in the smallest divorce effect if control was stopped  
666 after that period. This plan finds that it is optimal to perform the first few treatments relatively  
667 quickly, then to perform subsequent treatments during the peak in prevalence. We see that  
668 this is capable of nearly eliminating the Divorce Effect, but there is only a minimal benefit to the  
669 control, with large yearly outbreaks.

670

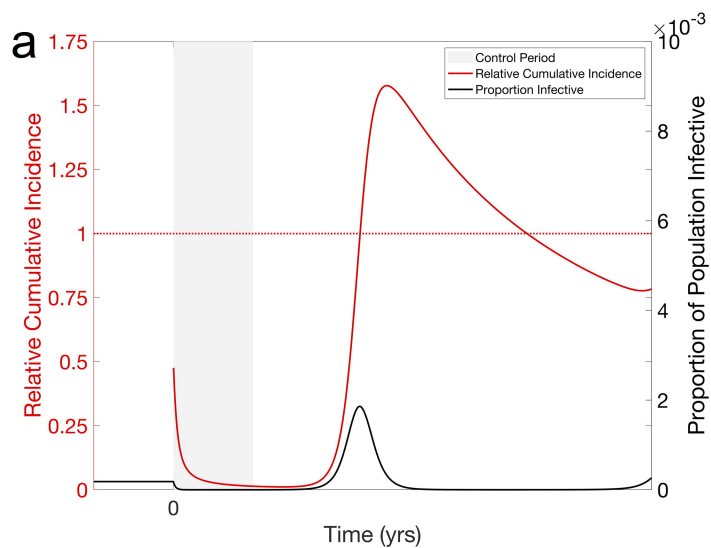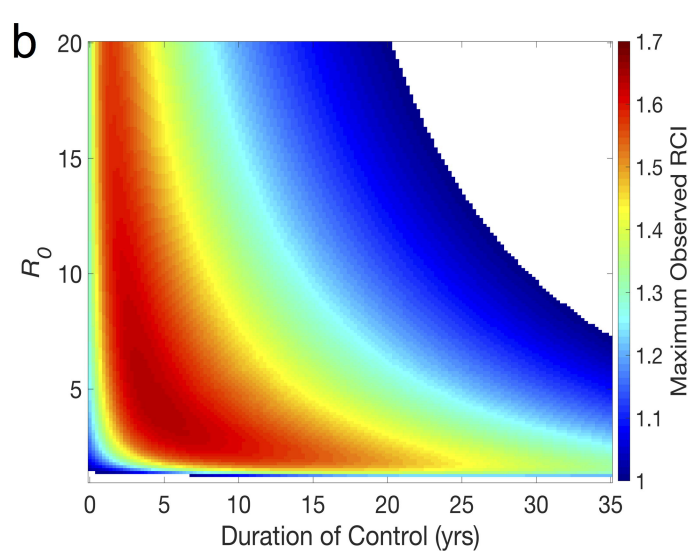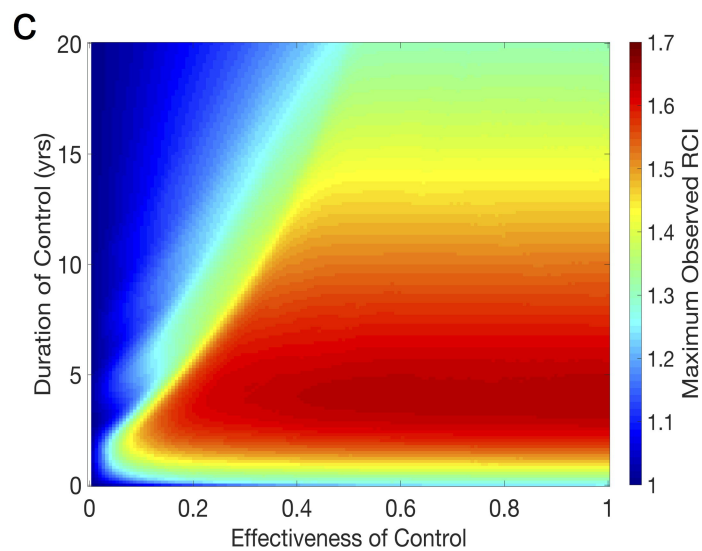



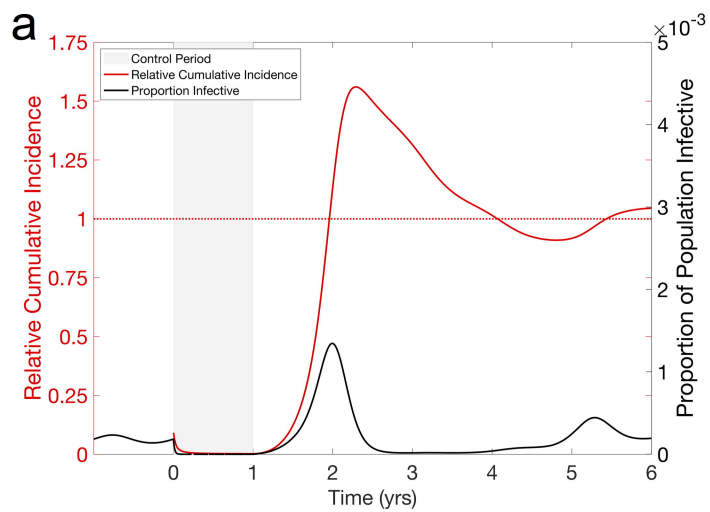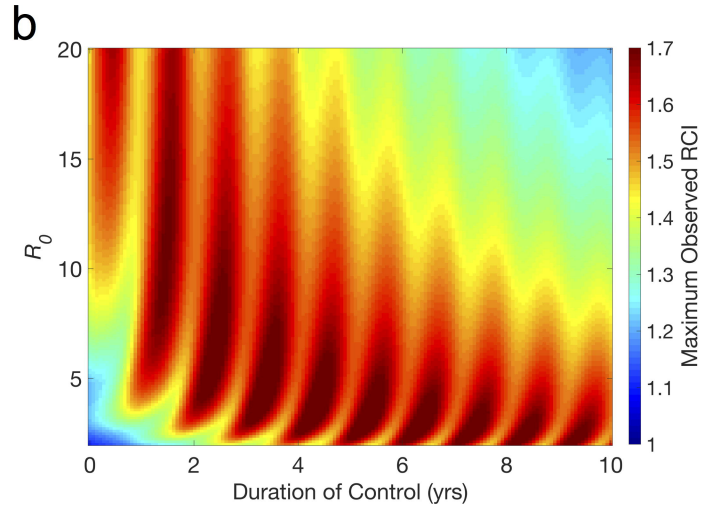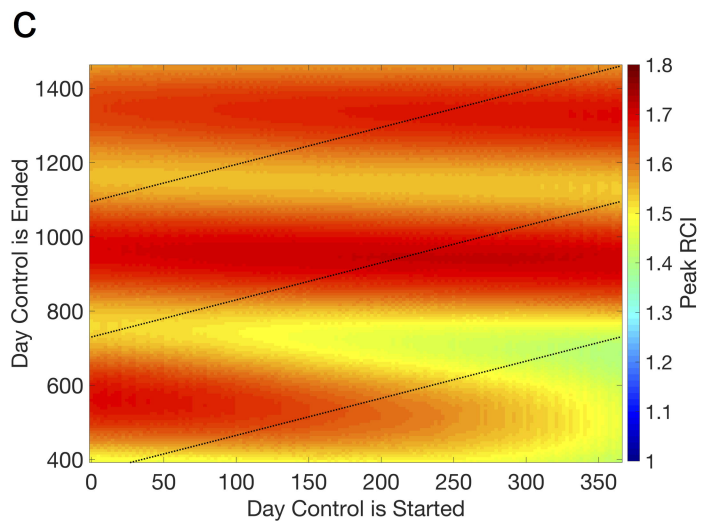

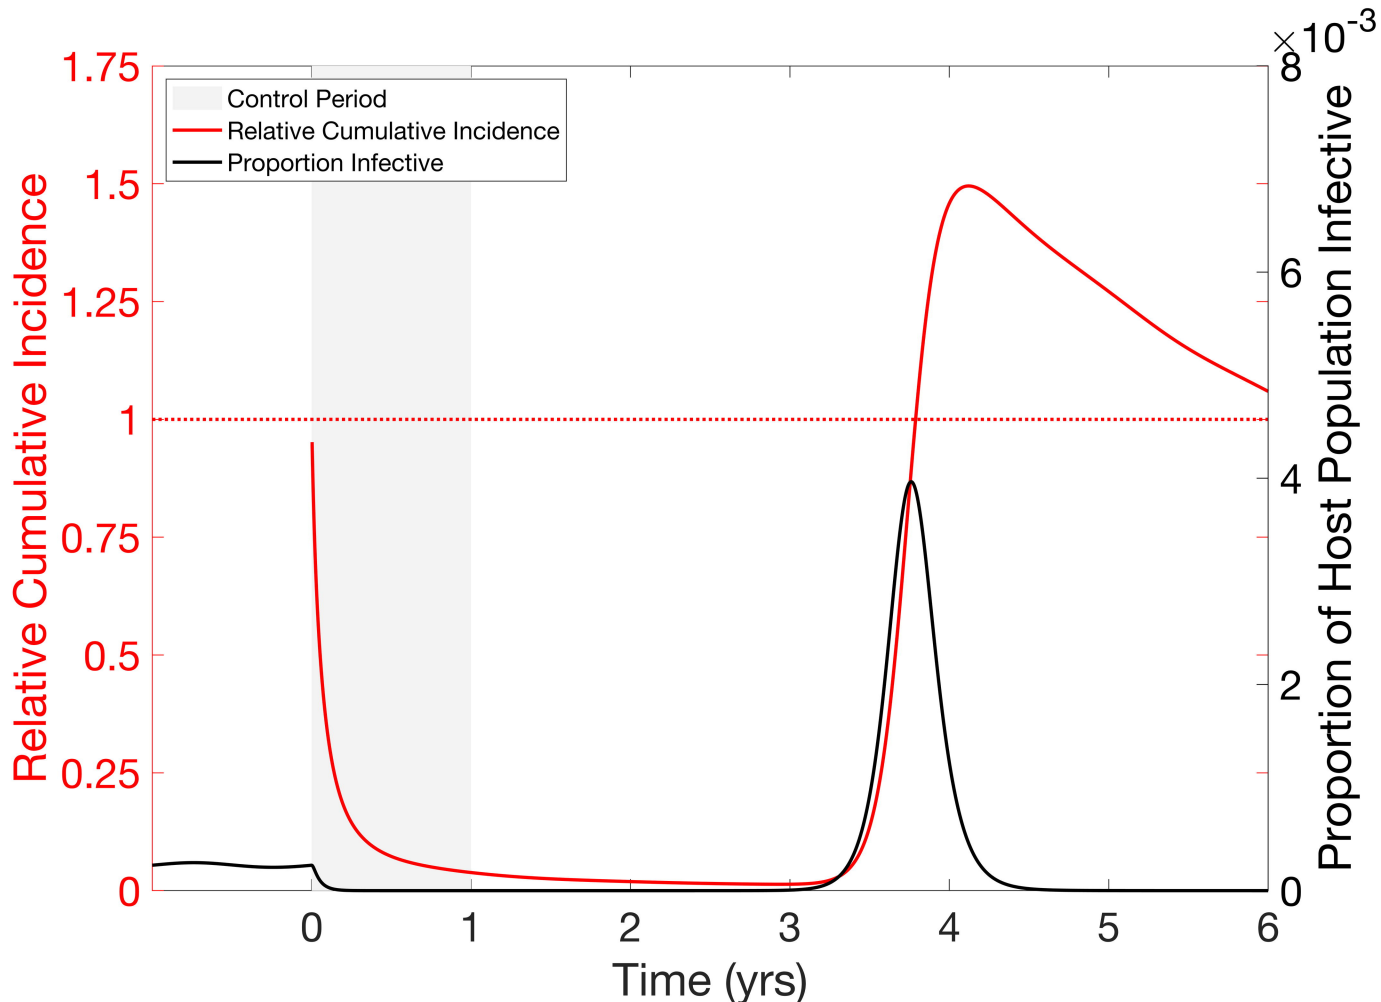

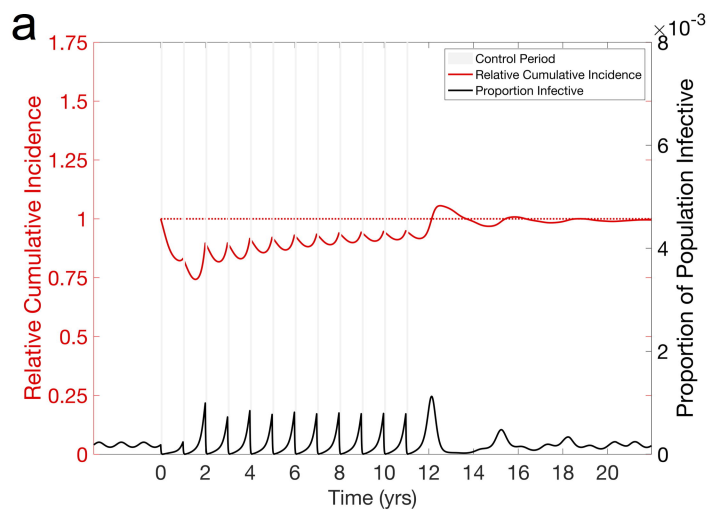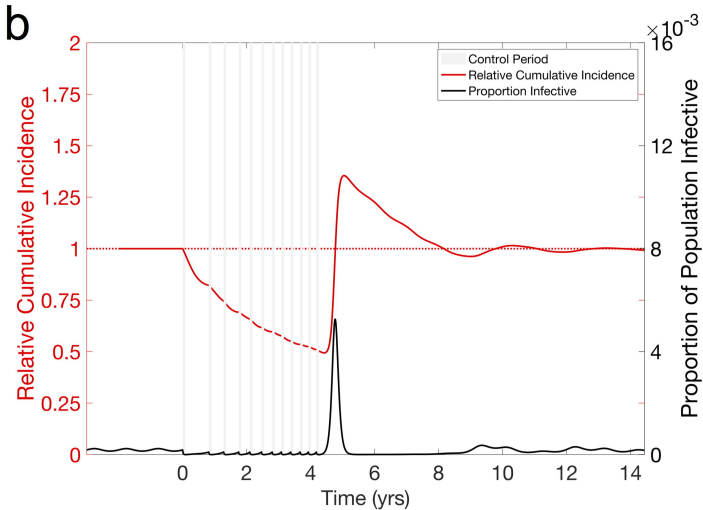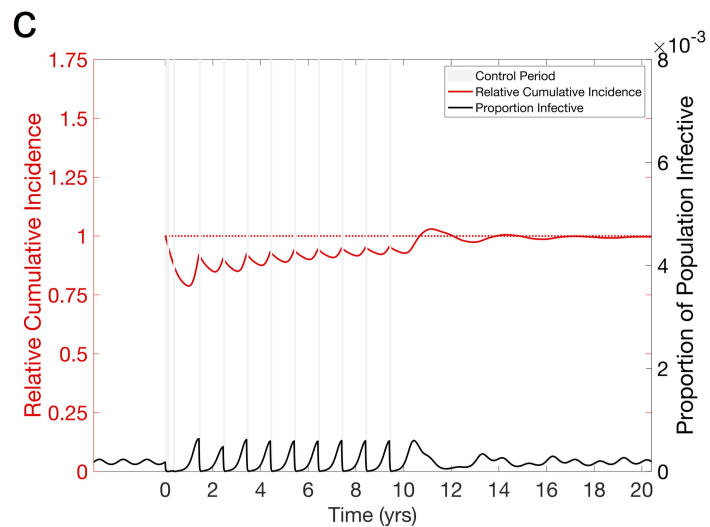

Source: https://www.biorxiv.org/content/biorxiv/early/2019/11/12/608653.full.pdf
